# Supplementary material for: Claudin-19 Mutations and Clinical Phenotype in Spanish Patients with Familial Hypomagnesemia with Hypercalciuria and Nephrocalcinosis
Source: PubMed Central journal article supplement (PMC3536807; doi:10.1371/journal.pone.0053151), 2013-01-03

Figure S1

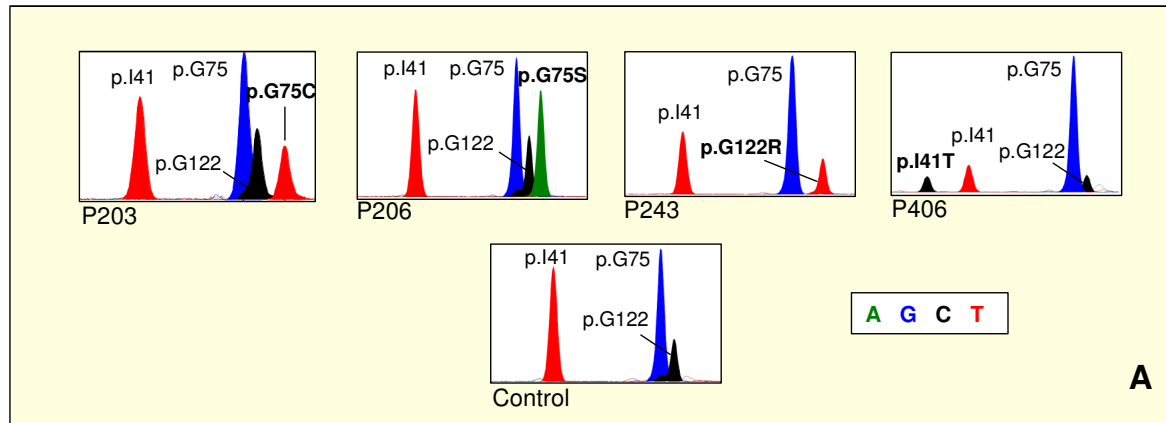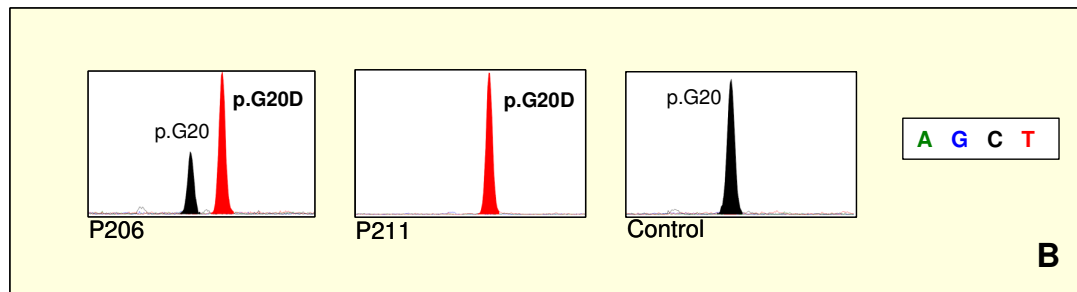

Supplement: pone.0053151.s001.pdf [file pone.0053151.s001.pdf]
